# Supplementary material for: The maturation zone is an important target of Piriformospora indica in Chinese cabbage roots
Source: PubMed Central journal article supplement (PMC3808330; doi:10.1093/jxb/ert265), 2013-09-04
Supplement: supp_ert265_jexbot099531_file001.pdf [file supp_ert265_jexbot099531_file001.pdf]

**Supplementary Table S1. Assembled clusters that contain more than four ESTs**

| Gene annotation                                            | Reference organism       | GI number | E-value | ESTs |
|------------------------------------------------------------|--------------------------|-----------|---------|------|
| <i>β-glucosidase 23</i>                                    | <i>A. thaliana</i>       | 75313794  | 1E-91   | 10   |
| <i>epidermis-specific secreted glycoprotein</i>            | <i>D. carota</i>         | 34921531  | 3E-52   | 10   |
| <i>glutathione S-transferase parC</i>                      | <i>N. tabacum</i>        | 1346215   | 5E-44   | 10   |
| <i>cytosolic glyceraldehyde-3-phosphate dehydrogenase</i>  | <i>S. alba</i>           | 120675    | 2E-127  | 9    |
| <i>cysteine proteinase</i>                                 | <i>A. thaliana</i>       | 30315954  | 3E-64   | 7    |
| <i>Vitamin-B12-independent methionine synthase isozyme</i> | <i>A. thaliana</i>       | 8134566   | 5E-77   | 7    |
| <i>V-type proton ATPase</i>                                | <i>A. thaliana</i>       | 15233060  | 6E-135  | 7    |
| <i>arginine decarboxylase 2</i>                            | <i>A. thaliana</i>       | 12229960  | 5E-118  | 6    |
| <i>glutamate synthase 1</i>                                | <i>A. thaliana</i>       | 300680981 | 2E-37   | 6    |
| <i>isocitrate dehydrogenase</i>                            | <i>G. max</i>            | 1708401   | 2E-100  | 6    |
| <i>MLP-like protein 328</i>                                | <i>A. thaliana</i>       | 21542149  | 9E-81   | 6    |
| <i>Ubiquitin</i>                                           | <i>A. thaliana</i>       | 28202244  | 4E-31   | 6    |
| <i>60S ribosomal protein</i>                               | <i>A. thaliana</i>       | 3123264   | 5E-30   | 5    |
| <i>glyoxalase II</i>                                       | <i>A. thaliana</i>       | 3913733   | 2E-67   | 5    |
| <i>zinc finger (C3HC4-type RING finger) family protein</i> | <i>A. thaliana</i>       | 18403707  | 1E-45   | 5    |
| <i>60S ribosomal protein L5-1</i>                          | <i>A. thaliana</i>       | 108860938 | 1E-22   | 4    |
| <i>60S ribosomal protein L8-3</i>                          | <i>A. thaliana</i>       | 75221276  | 1E-35   | 4    |
| <i>cysteine proteinase</i>                                 | <i>A. thaliana</i>       | 1172872   | 2E-33   | 4    |
| <i>elongation factor 2</i>                                 | <i>B. vulgaris</i>       | 6015065   | 9E-70   | 4    |
| <i>Enolase</i>                                             | <i>A. thaliana</i>       | 119350    | 1E-53   | 4    |
| <i>galactinol-sucrose galactosyltransferase 2</i>          | <i>A. thaliana</i>       | 269969644 | 3E-126  | 4    |
| <i>protein kinase</i>                                      | <i>A. thaliana</i>       | 22327668  | 6E-142  | 4    |
| <i>S-adenosyl-L-homocystein hydrolase 1</i>                | <i>A. thaliana</i>       | 6174970   | 2E-101  | 4    |
| <i>secologanin synthase</i>                                | <i>C. roseus</i>         | 461812    | 7E-65   | 4    |
| <i>rab family GTPase</i>                                   | <i>S. moellendorffii</i> | 302787058 | 2E-51   | 4    |
| <i>ubiquitin-conjugating enzyme</i>                        | <i>S. lycopersicum</i>   | 464981    | 6E-71   | 4    |
| <i>ω-6 fatty acid desaturase</i>                           | <i>B. juncea</i>         | 3334184   | 1E-68   | 4    |

**Supplementary Table S2. Selected examples of ESTs for genes related to cell wall metabolism**

| <b>Gene annotation</b>                                            | <b>Reference organism</b> | <b>GI number</b> | <b>E-value</b> | <b>ESTs</b> |
|-------------------------------------------------------------------|---------------------------|------------------|----------------|-------------|
| <i>alpha-L-arabinofuranosidase 1</i>                              | <i>A. thaliana</i>        | 75265802         | 5E-105         | 1           |
| <i>arabinogalactan peptidase 12</i>                               | <i>A. thaliana</i>        | 75273536         | 2E-13          | 1           |
| <i>cellulose synthase-like protein A9</i>                         | <i>A. thaliana</i>        | 75181330         | 1E-58          | 1           |
| <i>endoglucanase 5</i>                                            | <i>A. thaliana</i>        | 75186663         | 1E-32          | 1           |
| <i>endoglucanase 7</i>                                            | <i>A. thaliana</i>        | 75218974         | 8E-97          | 1           |
| <i>expansin A17</i>                                               | <i>A. thaliana</i>        | 20138096         | 3E-56          | 1           |
| <i>extensin 3</i>                                                 | <i>A. thaliana</i>        | 21263622         | 3E-4           | 1           |
| <i>fasciclin-like arabinogalactan protein 2</i>                   | <i>A. thaliana</i>        | 75207770         | 1E-42          | 1           |
| <i>fasciclin-like arabinogalactan protein 16</i>                  | <i>A. thaliana</i>        | 75158667         | 3E-75          | 1           |
| <i>pectinesterase inhibitor 51</i>                                | <i>A. thaliana</i>        | 75180831         | 3E-85          | 1           |
| <i>Polygalacturonase</i>                                          | <i>V. vinifera</i>        | 223635599        | 2E-49          | 1           |
| <i>polygalacturonase inhibitor 1</i>                              | <i>A. thaliana</i>        | 21263838         | 4E-48          | 3           |
| <i>rhamnose biosynthetic enzyme 1</i>                             | <i>A. thaliana</i>        | 62901057         | 6E-71          | 1           |
| xyloglucan<br>endotransglucosylase/hydrolase protein<br>14, XTH14 | <i>A. thaliana</i>        | 38605534         | 3E-88          | 1           |
| xyloglucan<br>endotransglucosylase/hydrolase protein<br>26, XTH26 | <i>A. thaliana</i>        | 38605519         | 3E-56          | 1           |

**Supplementary Table S3. Selected examples of ESTs for genes related to transporter**

| Gene annotation                                              | Reference organism                      | GI number | E-value | ESTs |
|--------------------------------------------------------------|-----------------------------------------|-----------|---------|------|
| <i>ABC transporter signature motif</i>                       | <i>A. lyrata</i> subsp. <i>lyrata</i>   | 297840569 | 1E-26   | 1    |
| <i>ABC-type transport-like protein</i>                       | <i>A. thaliana</i>                      | 4741190   | 5E-34   | 2    |
| <i>ADNT1, Adenine nucleotide transporter 1</i>               | <i>A. thaliana</i>                      | 15234063  | 1E-55   | 2    |
| <i>amino acid transmembrane transporter, LHT1</i>            | <i>A. thaliana</i>                      | 30693663  | 1E-100  | 1    |
| <i>amino acid transmembrane transporter, LHT1</i>            | <i>A. thaliana</i>                      | 30693663  | 1E-100  | 1    |
| <i>Aquaporin</i>                                             | <i>B. oleracea</i>                      | 11119335  | 3E-76   | 1    |
| <i>ATP:ADP antiporter</i>                                    | <i>A. thaliana</i>                      | 15240640  | 2E-70   | 1    |
| <i>auxin resistant 1 protein</i>                             | <i>B. rapa</i> subsp. <i>Campestris</i> | 270272090 | 1E-47   | 1    |
| <i>cationic amino acid transporter 2, CAT2</i>               | <i>A. thaliana</i>                      | 30696198  | 3E-23   | 1    |
| <i>efflux carrier, pin3</i>                                  | <i>B. juncea</i>                        | 15485155  | 3E-96   | 1    |
| <i>epsilon-adaptin</i>                                       | <i>A. thaliana</i>                      | 30692596  | 1E-29   | 1    |
| <i>ethylene insensitive 2, EIN2</i>                          | <i>A. thaliana</i>                      | 15242709  | 4E-86   | 1    |
| <i>ferric reductase defective 3, antiporter</i>              | <i>A. thaliana</i>                      | 15231918  | 3E-56   | 1    |
| <i>F-type proton ATPase</i>                                  | <i>A. thaliana</i>                      | 166746    | 1E-74   | 3    |
| <i>glucose transporter</i>                                   | <i>A. thaliana</i>                      | 21618276  | 2E-142  | 1    |
| <i>glycerol-3-phosphate transporter</i>                      | <i>A. thaliana</i>                      | 18408421  | 2E-134  | 1    |
| <i>GTP binding / phospholipase activator</i>                 | <i>A. thaliana</i>                      | 15228723  | 2E-81   | 1    |
| <i>GTP-binding protein</i>                                   | <i>A. thaliana</i>                      | 3334322   | 4E-42   | 1    |
| <i>inorganic phosphate transporter 1-7 /Pi cotransporter</i> | <i>A. lyrata</i> subsp. <i>lyrata</i>   | 297820224 | 4E-25   | 1    |
| <i>lipid transfer protein</i>                                | <i>B. rapa</i> subsp. <i>Pekinensis</i> | 48093506  | 3E-21   | 1    |
| <i>lipid transfer protein precursor</i>                      | <i>B. rapa</i> subsp. <i>pekinensis</i> | 122939101 | 8E-22   | 1    |
| <i>MATE efflux family protein</i>                            | <i>A. thaliana</i>                      | 15223402  | 3E-96   | 1    |
| <i>mitochondrial import receptor subunit TOM20</i>           | <i>A. lyrata</i> subsp. <i>lyrata</i>   | 297851168 | 8E-64   | 1    |
| <i>mitochondrial phosphate transporter</i>                   | <i>A. lyrata</i> subsp. <i>lyrata</i>   | 297811523 | 4E-95   | 2    |
| <i>nitrate transporter</i>                                   | <i>B. napus</i>                         | 9971067   | 3E-104  | 1    |

|                                                              |                                       |           |        |   |
|--------------------------------------------------------------|---------------------------------------|-----------|--------|---|
| <i>nitrate transporter</i>                                   | <i>A. lyrata</i> subsp. <i>lyrata</i> | 297825869 | 8E-53  | 1 |
| <i>nitrate transporter</i>                                   | <i>B. napus</i>                       | 9971067   | 6E-76  | 1 |
| <i>Nonclathrin coat protein, protein transporter</i>         | <i>A. thaliana</i>                    | 110741159 | 1E-42  | 2 |
| <i>oligopeptide transporter</i>                              | <i>A. thaliana</i>                    | 145359208 | 8E-97  | 1 |
| <i>phosphate transporter</i>                                 | <i>A. lyrata</i> subsp. <i>lyrata</i> | 297823783 | 2E-81  | 2 |
| <i>plant uncoupling mitochondrial protein 1, PUMP1</i>       | <i>A. thaliana</i>                    | 15232420  | 4E-98  | 1 |
| <i>potassium channel</i>                                     | <i>A. thaliana</i>                    | 79326141  | 3E-22  | 1 |
| <i>protein transporter</i>                                   | <i>A. thaliana</i>                    | 238479693 | 1E-102 | 1 |
| <i>protein transporter</i>                                   | <i>A. thaliana</i>                    | 79494763  | 2E-109 | 1 |
| <i>protein transporter</i>                                   | <i>Z. may</i>                         | 226495857 | 7E-47  | 1 |
| <i>proton-dependent oligopeptide transport, POT</i>          | <i>A. thaliana</i>                    | 15221883  | 2E-128 | 1 |
| <i>P-type proton ATPase</i>                                  | <i>A. thaliana</i>                    | 62321204  | 4E-68  | 1 |
| <i>pyrophosphate-energized vacuolar membrane proton pump</i> | <i>T. salsuginea</i>                  | 60476796  | 4E-111 | 2 |
| <i>rab family GTPase</i>                                     | <i>S. moellendorffii</i>              | 302787058 | 2E-51  | 4 |
| <i>Rab GTPase</i>                                            | <i>A. lyrata</i> subsp. <i>Lyrata</i> | 297830542 | 2E-81  | 1 |
| <i>transport protein particle; TRAPP</i>                     | <i>A. thaliana</i>                    | 15239731  | 4E-96  | 1 |
| <i>Transporter</i>                                           | <i>A. thaliana</i>                    | 15234794  | 8E-57  | 1 |
| <i>two-pore calcium channel</i>                              | <i>A. thaliana</i>                    | 14041819  | 7E-68  | 1 |
| <i>vesicle-mediated transport</i>                            | <i>A. thaliana</i>                    | 30681419  | 6E-57  | 1 |
| <i>V-type proton ATPase</i>                                  | <i>R. communis</i>                    | 255539062 | 2E-65  | 2 |
| <i>V-type proton ATPase</i>                                  | <i>A. thaliana</i>                    | 15233060  | 4E-79  | 7 |
| <i>V-type proton ATPase</i>                                  | <i>E. salsugineum</i>                 | 60476796  | 3E-134 | 2 |
| <i>V-type proton ATPase</i>                                  | <i>G. hirsutum</i>                    | 111154399 | 7E-34  | 1 |
| <i>water channel-like protein</i>                            | <i>A. thaliana</i>                    | 21593526  | 5E-32  | 1 |
| <i>WD-40 repeat family protein, protein transport</i>        | <i>A. thaliana</i>                    | 30695804  | 1E-51  | 1 |

**Supplementary Table S4. Selected examples of ESTs for genes related to phytohormones biosynthesis and response**

| Gene annotation                                               | Reference organism                          | GI number | E-value | ESTs |
|---------------------------------------------------------------|---------------------------------------------|-----------|---------|------|
| <b>Abscisic acid:</b>                                         |                                             |           |         |      |
| ABI5-binding protein 1                                        | <i>A. thaliana</i>                          | 75180099  | 2E-16   | 1    |
| <i>abscisic acid receptor PYL8</i>                            | <i>A. thaliana</i>                          | 75170450  | 5E-21   | 1    |
| <b>Auxin:</b>                                                 |                                             |           |         |      |
| 26S proteasome subunit 4-like protein                         | <i>B. napus</i>                             | 11045086  | 2E-102  | 1    |
| <i>26S proteasome AAA-ATPase subunit RPT4a</i>                | <i>A. thaliana</i>                          | 6652884   | 3E-62   | 1    |
| <i>26S proteasome regulatory complex subunit subunit P42d</i> | <i>A. thaliana</i>                          | 1521950 3 | 9E-61   | 1    |
| ARF1-binding protein                                          | <i>A. thaliana</i>                          | 62319903  | 5E-107  | 1    |
| auxin-responsive family protein                               | <i>A. lyrata</i><br>subsp.<br><i>Lyrata</i> | 21592781  | 2E-100  | 1    |
| auxin-regulated protein                                       | <i>P. trichocarpa</i>                       | 109676318 | 6E-5    | 1    |
| auxin resistant 1, AUX1                                       | <i>A. thaliana</i>                          | 18404642  | 2E-47   | 1    |
| auxin transport protein, BIG                                  | <i>A. thaliana</i>                          | 21779966  | 2E-41   | 1    |
| <i>cullin-associated and neddylation dissociated 1, CAND1</i> | <i>A. thaliana</i>                          | 22325430  | 7E-51   | 1    |
| <i>E2 ubiquitin-conjugating enzyme, UBC 10</i>                | <i>A. thaliana</i>                          | 183013548 | 2E-59   | 1    |
| <i>efflux carrier, pin3</i>                                   | <i>B. juncea</i>                            | 15485155  | 3E-96   | 1    |
| F-box/LRR-repeat protein 15                                   | <i>A. thaliana</i>                          | 124007179 | 9E-110  | 1    |
| <i>glutathione S-transferase parC</i>                         | <i>N. tabacum</i>                           | 1346215   | 2E-75   | 10   |
| <i>IAA7-auxin-response AUX/IAA family member</i>              | <i>Z. may</i>                               | 195635917 | 1E-38   | 1    |
| <i>IAA-conjugate-resistant 4</i>                              | <i>A. lyrata</i><br>subsp.<br><i>lyrata</i> | 297850898 | 4E-101  | 1    |
| nodulin-like protein                                          | <i>A. thaliana</i>                          | 5262203   | 2E-122  | 1    |
| phytochrome-associated protein 1                              | <i>A. thaliana</i>                          | 4093155   | 3E-78   | 3    |
| <i>pyrophosphate-energized vacuolar membrane proton pump</i>  | <i>T.salsuginea</i>                         | 60476796  | 3E-111  | 2    |
| <i>secologanin synthase</i>                                   | <i>C. roseus</i>                            | 461812    | 7E-65   | 4    |
| <i>ubiquitinating enzyme</i>                                  | <i>A. thaliana</i>                          | 66354424  | 9E-71   | 1    |
| <i>ubiquitin conjugating enzyme 9</i>                         | <i>A. thaliana</i>                          | 18417097  | 1E-70   | 1    |
| <i>V-type proton ATPase</i>                                   | <i>A. thaliana</i>                          | 62321641  | 9E-66   | 1    |
| WD-40 repeat protein                                          | <i>A. thaliana</i>                          | 2289095   | 5E-56   | 1    |

|                                                 |                    |          |       |   |
|-------------------------------------------------|--------------------|----------|-------|---|
| <b>Brassinosteroid:</b>                         |                    |          |       |   |
| <i>brassinazole-resistant 2, BIN2</i>           | <i>A. thaliana</i> | 57012618 | 1E-17 | 2 |
| <i>BRI-EMS-suppressor 1, BES1</i>               | <i>A. thaliana</i> | 42571545 | 3E-72 | 2 |
| <b>Ethylene:</b>                                |                    |          |       |   |
| AP2-domain protein RAP2.2                       | <i>A. thaliana</i> | 2281629  | 3E-50 | 1 |
| ethylene insensitive 2, EIN2                    | <i>A. thaliana</i> | 15242709 | 4E-86 | 1 |
| <i>ethylene-responsive transcription factor</i> | <i>A. thaliana</i> | 75264007 | 8E-15 | 1 |
| <i>S-adenosylmethionine synthase 3</i>          | <i>B. juncea</i>   | 75306464 | 1E-87 | 2 |
| <i>S-adenosylmethionine synthase 4</i>          | <i>B. juncea</i>   | 75306463 | 1E-98 | 1 |

**Supplementary Table S5. Selected examples of ESTs for genes related to root development**

| <b>Gene annotation</b>                                        | <b>Reference organism</b> | <b>GI number</b> | <b>E-value</b> | <b>ESTs</b> |
|---------------------------------------------------------------|---------------------------|------------------|----------------|-------------|
| auxin-responsive family protein                               | <i>A. lyrata subsp.</i>   | 21592781         | 2E-100         | 1           |
| <i>cullin-associated and neddylation dissociated 1, CAND1</i> | <i>A. thaliana</i>        | 22325430         | 7E-51          | 1           |
| <i>ferredoxin-NADP reductase 2</i>                            | <i>A. thaliana</i>        | 297851496        | 1E-56          | 1           |
| nodulin-like protein                                          | <i>A. thaliana</i>        | 5262203          | 2E-122         | 1           |
| <i>root hair defective 4, RHD4</i>                            | <i>A. thaliana</i>        | 30693470         | 2E-99          | 1           |

**Supplementary Table S6. Selected examples of ESTs for genes related to amino acid metabolism**

| Gene annotation                                                             | Reference organism     | GI number | E-value | ESTs |
|-----------------------------------------------------------------------------|------------------------|-----------|---------|------|
| <b>Arginine</b>                                                             |                        |           |         |      |
| <i>arginine decarboxylase</i>                                               | <i>A. thaliana</i>     | 12229960  | 1E-113  | 6    |
| <b>Aspartate</b>                                                            |                        |           |         |      |
| <i>aspartate aminotransferase</i>                                           | <i>A. thaliana</i>     | 21542386  | 6E-32   | 1    |
| <b>Cysteine and methionine</b>                                              |                        |           |         |      |
| <i>5-methyltetrahydropteroyltriglutamate-homocysteine methyltransferase</i> | <i>A. thaliana</i>     | 8134566   | 2E-109  | 1    |
| <i>S-adenosyl-L-homocystein hydrolase 1</i>                                 | <i>A. thaliana</i>     | 6174970   | 2E-101  | 4    |
| <i>cysteine synthase</i>                                                    | <i>A. thaliana</i>     | 11131561  | 2E-51   | 1    |
| <i>S-adenosylmethionine decarboxylase proenzyme 3</i>                       | <i>A. thaliana</i>     | 15213968  | 2E-130  | 1    |
| <b>Glycine, serine and threonine</b>                                        |                        |           |         |      |
| <i>D-3-phosphoglycerate dehydrogenase</i>                                   | <i>A. thaliana</i>     | 3122858   | 4E-62   | 1    |
| <i>diaminopimelate decarboxylase 1</i>                                      | <i>A. thaliana</i>     | 75306310  | 2E-88   | 1    |
| <i>glutamate synthase 1</i>                                                 | <i>A. thaliana</i>     | 300680981 | 2E-37   | 6    |
| <b>Histidine</b>                                                            |                        |           |         |      |
| <i>histidine decarboxylase</i>                                              | <i>S. lycopersicum</i> | 1706319   | 6E-72   | 1    |
| <b>Phenylalanine</b>                                                        |                        |           |         |      |
| <i>trans-cinnamate 4-monooxygenase</i>                                      | <i>A. thaliana</i>     | 3915085   | 2E-78   | 1    |
| <b>Tryptophan</b>                                                           |                        |           |         |      |
| <i>tryptophan N-hydroxylase 1</i>                                           | <i>A. thaliana</i>     | 12644083  | 4E-143  | 1    |
| <i>tryptophan synthase beta chain 2</i>                                     | <i>A. thaliana</i>     | 174779    | 5E-157  | 2    |



**Supplemental Table 7. Selected examples of ESTs for genes related to stress response**

| <b>Gene annotation</b>                             | <b>Reference organism</b>        | <b>GI number</b> | <b>E-value</b> | <b>ESTs</b> |
|----------------------------------------------------|----------------------------------|------------------|----------------|-------------|
| <i>alcohol dehydrogenase</i>                       | <i>B. oleracea</i>               | 6684350          | 9E-73          | 1           |
| <i>aquaporin PIP1-5</i>                            | <i>A. thaliana</i>               | 32363338         | 2E-33          | 2           |
| <i>Catalase</i>                                    | <i>B. napus</i>                  | 5487875          | 2E-118         | 1           |
| <i>chaperone protein dnaJ 2</i>                    | <i>A. thaliana</i>               | 21431768         | 3E-94          | 1           |
| <i>constitutively activated cell death 1, CAD1</i> | <i>A. thaliana</i>               | 18397204         | 2E-55          | 1           |
| <i>copper/zinc superoxide dismutase</i>            | <i>A. lyrata subsp. Lyrata</i>   | 297826125        | 4E-81          | 1           |
| <i>dehydration-responsive family protein</i>       | <i>A. thaliana</i>               | 18405149         | 3E-64          | 2           |
| <i>dehydration stress-induced protein</i>          | <i>A. thaliana</i>               | 21553555         | 1E-66          | 1           |
| <i>dehydroascorbate reductase</i>                  | <i>B. rapa subsp. Pekinensis</i> | 33285914         | 2E-47          | 1           |
| <i>disease resistance response protein</i>         | <i>B. rapa</i>                   | 157849646        | 1E-44          | 1           |
| <i>glutathione S-transferase 6</i>                 | <i>A. thaliana</i>               | 20197312         | 1E-41          | 1           |
| <i>glutathione S-transferase parC</i>              | <i>N. tabacum</i>                | 1346215          | 5E-44          | 10          |
| <i>heat shock factor binding protein 3, HSFB3</i>  | <i>A. lyrata subsp. Lyrata</i>   | 297824131        | 9E-22          | 2           |
| <i>heat shock factor binding protein</i>           | <i>O. sativa japonica</i>        | 11862947         | 5E-20          | 1           |
| <i>heat shock protein 70</i>                       | <i>A. thaliana</i>               | 240254411        | 2E-52          | 1           |
| <i>manganese superoxide dismutase 1</i>            | <i>B. napus</i>                  | 169244541        | 1E-99          | 2           |
| <i>monodehydroascorbate reductase</i>              | <i>B. juncea</i>                 | 4704613          | 3E-59          | 1           |
| <i>monodehydroascorbate reductase</i>              | <i>B. rapa subsp. Pekinensis</i> | 14764532         | 1E-97          | 2           |
| <i>osmotin-like protein</i>                        | <i>A. thaliana</i>               | 21542444         | 2E-41          | 3           |
| <i>Peroxidase</i>                                  | <i>A. thaliana</i>               | 15234648         | 2E-96          | 1           |
| <i>Peroxidase</i>                                  | <i>R. sativus var. niger</i>     | 166198115        | 2E-62          | 2           |
| <i>Peroxidase</i>                                  | <i>R. sativus var. niger</i>     | 49609452         | 3E-82          | 1           |
| <i>Peroxidase</i>                                  | <i>A. thaliana</i>               | 15237613         | 3E-87          | 2           |
| <i>Peroxidase</i>                                  | <i>A. thaliana</i>               | 2894574          | 5E-104         | 1           |
| <i>phosphate starvation-response 3.1, PYK10</i>    | <i>A. thaliana</i>               | 15232626         | 2E-90          | 1           |
| <i>senescence-associated cysteine protease</i>     | <i>B. oleracea</i>               | 18141289         | 5E-110         | 1           |
| <i>sulfite oxidase, SOX</i>                        | <i>A. thaliana</i>               | 79295451         | 7E-110         | 1           |

|                                                |                    |           |       |   |
|------------------------------------------------|--------------------|-----------|-------|---|
| superoxide dismutase                           | <i>R. sativus</i>  | 3114705   | 1E-15 | 1 |
| thioredoxin H-type                             | <i>B. rapa</i>     | 11135129  | 9E-62 | 1 |
| universal stress protein A-like protein        | <i>A. thaliana</i> | 115502895 | 1E-79 | 1 |
| WD-40 repeat family protein, protein transport | <i>A. thaliana</i> | 30695804  | 1E-51 | 1 |

**Supplementary Table S8. Selected examples of ESTs for genes related to signal transduction**

| Gene annotation                                   | Reference organism               | GI number | E-value | ESTs |
|---------------------------------------------------|----------------------------------|-----------|---------|------|
| <b>Transcription factor</b>                       |                                  |           |         |      |
| <i>AP2-domain protein</i>                         | <i>A. thaliana</i>               | 15219839  | 3E-14   | 1    |
| <i>AP2-domain protein RAP2.2</i>                  | <i>A. thaliana</i>               | 2281629   | 3E-50   | 1    |
| <i>ARF1-binding protein</i>                       | <i>A. thaliana</i>               | 62319903  | 2E-107  | 1    |
| <i>brassinosteroid-responsive ring-H2, BRH1</i>   | <i>A. thaliana</i>               | 15233117  | 5E-87   | 1    |
| <i>BRI1-EMS-Suppressor 1</i>                      | <i>A. thaliana</i>               | 42571545  | 3E-72   | 2    |
| <i>flowering locus C1 variant 2</i>               | <i>B. rapa var. purpuraria</i>   | 282721250 | 1E-76   | 1    |
| <i>G-box binding factor 5</i>                     | <i>A. lyrata subsp. lyrata</i>   | 297836540 | 5E-39   | 1    |
| <i>general regulatory factor 8</i>                | <i>A. thaliana</i>               | 30698122  | 2E-40   | 1    |
| <i>HAT22</i>                                      | <i>A. thaliana</i>               | 15235712  | 3E-106  | 1    |
| <i>heat shock factor binding protein</i>          | <i>O. sativa japonica</i>        | 11862947  | 5E-2    | 1    |
| <i>heat shock factor binding protein 3, HSFB3</i> | <i>A. lyrata subsp. Lyrata</i>   | 297824131 | 9E-22   | 2    |
| <i>homeodomain protein KNAT1/BP</i>               | <i>A. thaliana</i>               | 19908861  | 1E-51   | 1    |
| <i>Myb-domain protein</i>                         | <i>A. thaliana</i>               | 18395724  | 1E-56   | 2    |
| <i>Myb-domain protein 13</i>                      | <i>A. thaliana</i>               | 15221419  | 1E-21   | 1    |
| <i>Myb-domain protein 51-2</i>                    | <i>B. rapa subsp. Pekinensis</i> | 238625815 | 5E-130  | 1    |
| <i>NAC-domain protein 14</i>                      | <i>B. napus (rape)</i>           | 31322580  | 2E-96   | 1    |
| <i>NAC-domain protein 3</i>                       | <i>B. napus</i>                  | 31322568  | 2E-40   | 1    |
| <i>NAC-domain protein 58</i>                      | <i>A. thaliana</i>               | 15229637  | 5E-51   | 1    |
| <i>PHD finger family protein</i>                  | <i>A. lyrata subsp. Lyrata</i>   | 297849860 | 1E-27   | 1    |
| <i>reduced vernalization 1 response 1, VRN1</i>   | <i>A. thaliana</i>               | 30685150  | 8E-71   | 1    |
| <i>TOE2</i>                                       | <i>A. thaliana</i>               | 30697332  | 5E-6    | 1    |
| <i>WRKY-domain protein 21</i>                     | <i>A. lyrata subsp. Lyrata</i>   | 297822775 | 1E-59   | 1    |
| <i>WRKY-domain protein 21-1</i>                   | <i>B. napus</i>                  | 206574950 | 6E-12   | 1    |
| <i>WRKY-domain protein 65-1</i>                   | <i>B. napus (rape)</i>           | 206574990 | 2E-33   | 1    |
| <i>zinc finger (A20 and AN1) family protein</i>   | <i>B. rapa</i>                   | 119720772 | 1E-63   | 1    |

|                                                            |                                |           |        |   |
|------------------------------------------------------------|--------------------------------|-----------|--------|---|
| <i>zinc finger (C3HC4-type RING finger) family protein</i> | <i>A. thaliana</i>             | 18403707  | 1E-45  | 5 |
| <i>zinc finger (CCCH-type) family protein</i>              | <i>A. thaliana</i>             | 15231090  | 3E-82  | 1 |
| <i>zinc finger (RanBP2-type) family protein</i>            | <i>A. thaliana</i>             | 34395889  | 4E-19  | 1 |
| <i>zinc finger family protein</i>                          | <i>A. lyrata subsp. Lyrata</i> | 297812437 | 5E-23  | 3 |
| <i>zinc finger family protein, salt inducible</i>          | <i>A. thaliana</i>             | 18410398  | 3E-45  | 1 |
| <b>Calcium-related protein</b>                             |                                |           |        |   |
| <i>calcium-binding EF hand family protein</i>              | <i>A. lyrata subsp.</i>        | 297848776 | 8E-109 | 1 |
| <i>calcium-binding protein, annexin 3</i>                  | <i>B. juncea</i>               | 229458366 | 1E-68  | 1 |
| <i>calcium-dependent protein kinase 6</i>                  | <i>A. lyrata subsp</i>         | 297799626 | 3E-127 | 1 |
| <i>calmodulin-binding adenosine diphosphatase</i>          | <i>A. lyrata subsp. Lyrata</i> | 297811997 | 9E-60  | 1 |
| <i>calmodulin-binding channel, ATCNGC9</i>                 | <i>A. thaliana</i>             | 15234769  | 5E-93  | 1 |
| <i>calmodulin-binding protein, IQD13</i>                   | <i>A. thaliana</i>             | 15231733  | 2E-97  | 1 |
| <i>calmodulin-binding protein, IQD2</i>                    | <i>A. thaliana</i>             | 145357576 | 2E-70  | 1 |
| <i>CBL-interacting protein kinase</i>                      | <i>B. napus</i>                | 17224924  | 1E-89  | 2 |
| <i>CBL-interacting protein kinase 1</i>                    | <i>A. lyrata subsp.</i>        | 297834664 | 9E-46  | 1 |
| <i>two-pore calcium channel, ATPC1</i>                     | <i>A. thaliana</i>             | 18412295  | 1E-68  | 1 |
| <b>Kinase</b>                                              |                                |           |        |   |
| <i>adenosine kinase 1, ADK1</i>                            | <i>A. thaliana</i>             | 42572347  | 2E-18  | 1 |
| <i>calcium-dependent protein kinase 6</i>                  | <i>A. lyrata subsp. Lyrata</i> | 297799626 | 3E-127 | 1 |
| <i>CBL-interacting protein kinase</i>                      | <i>Brassica napus (rape)</i>   | 17224924  | 1E-87  | 2 |
| <i>CBL-interacting protein kinase 1</i>                    | <i>A. lyrata subsp.</i>        | 297834664 | 9E-46  | 1 |
| <i>chloroplastic adenylate kinase 1</i>                    | <i>A. lyrata subsp. Lyrata</i> | 297823551 | 2E-85  | 1 |
| <i>cyclin-dependent kinase C1</i>                          | <i>A. lyrata subsp. Lyrata</i> | 297811129 | 1E-92  | 1 |
| <i>lectin protein kinase</i>                               | <i>A. lyrata subsp. Lyrata</i> | 297802800 | 2E-76  | 1 |
| <i>leucine-rich repeat protein kinase</i>                  | <i>A. thaliana</i>             | 18422906  | 1E-86  | 1 |
| <i>light repressible receptor protein kinase</i>           | <i>A. thaliana</i>             | 1321686   | 3E-79  | 1 |
| <i>pfkB-type carbohydrate kinase</i>                       | <i>A. lyrata subsp.</i>        | 297844934 | 2E-62  | 1 |

|                                                                           |                                               |           |        |   |
|---------------------------------------------------------------------------|-----------------------------------------------|-----------|--------|---|
|                                                                           | <i>Lyrata</i>                                 |           |        |   |
| <i>phosphatidylinositol-4-phosphate 5-kinase,</i>                         | <i>A. lyrata</i> subsp. <i>Lyrata</i>         | 297845202 | 7E-100 | 1 |
| <i>phosphoenolpyruvate carboxykinase 1, PCK1</i>                          | <i>A. thaliana</i>                            | 15235730  | 2E-65  | 2 |
| <i>protein kinase</i>                                                     | <i>A. lyrata</i> subsp. <i>Lyrata</i>         | 297797331 | 5E-54  | 3 |
| <i>protein kinase</i>                                                     | <i>A. thaliana</i>                            | 22327668  | 6E-142 | 4 |
| <i>protein kinase, D6PK</i>                                               | <i>A. thaliana</i>                            | 15241076  | 2E-113 | 1 |
| <i>protein kinase, FUS3</i>                                               | <i>A. lyrata</i> subsp. <i>Lyrata</i>         | 297820088 | 8E-82  | 1 |
| <i>protein kinase, WNK4</i>                                               | <i>A. thaliana</i>                            | 15237174  | 3E-91  | 1 |
| <i>pyruvate kinase</i>                                                    | <i>A. thaliana</i>                            | 110739133 | 4E-49  | 2 |
| <i>receptor protein kinase, CLAVATA1 precursor</i>                        | <i>A. thaliana</i>                            | 15239123  | 4E-50  | 2 |
| <i>receptor-associated kinase, SUB</i>                                    | <i>A. thaliana</i>                            | 30682076  | 5E-63  | 1 |
| <i>ribitol kinase</i>                                                     | <i>A. thaliana</i>                            | 42567264  | 7E-108 | 1 |
| <i>shaggy related protein kinase, ASK-γ</i>                               | <i>A. thaliana</i>                            | 21553877  | 4E-165 | 2 |
| <b>Phosphatase</b>                                                        |                                               |           |        |   |
| <i>3(2),5-bisphosphate nucleotidase</i>                                   | <i>A. thaliana</i>                            | 21618152  | 3E-30  | 1 |
| <i>calcium-binding protein, ABI1</i>                                      | <i>A. thaliana</i>                            | 509419    | 9E-54  | 1 |
| <i>calmodulin-binding adenosine diphosphatase</i>                         | <i>A. lyrata</i> subsp. <i>Lyrata</i>         | 297811997 | 9E-60  | 1 |
| <i>phosphatidylinositol-4,5-bisphosphate 5-phosphatase</i>                | <i>A. thaliana</i>                            | 30693470  | 9E-100 | 1 |
| <i>phospholipase D α1</i>                                                 | <i>Brassica oleracea</i> var. <i>capitata</i> | 13124444  | 4E-110 | 1 |
| <i>protein phosphatase 2A</i>                                             | <i>A. thaliana</i>                            | 683502    | 8E-133 | 1 |
| <i>protein phosphatase 2C</i>                                             | <i>Thellungiella halophila</i>                | 20340237  | 3E-60  | 1 |
| <i>trehalose-6-phosphate phosphatase</i>                                  | <i>A. thaliana</i>                            | 15235713  | 1E-68  | 1 |
| <i>type I inositol polyphosphate 5-phosphatase</i>                        | <i>A. thaliana</i>                            | 42569699  | 9E-57  | 1 |
| <i>type I phosphodiesterase/nucleotide pyrophosphatase family protein</i> | <i>A. lyrata</i> subsp. <i>Lyrata</i>         | 297799022 | 3E-115 | 1 |
| <i>vacuolar purple acid phosphatase, AtPAP26</i>                          | <i>A. lyrata</i> subsp. <i>Lyrata</i>         | 297805048 | 2E-75  | 1 |

**Supplementary Table S9. Selected examples of ESTs for genes related to cell structure and division**

| <b>Gene annotation</b>                                  | <b>Reference organism</b> | <b>GI number</b> | <b>E-value</b> | <b>ESTs</b> |
|---------------------------------------------------------|---------------------------|------------------|----------------|-------------|
| <i>tubulin alpha-1, TUA1</i>                            | <i>G. hirsutum</i>        | 54036491         | 5E-22          | 1           |
| <i>tubulin alpha-1, TUA1</i>                            | <i>A. thaliana</i>        | 267070           | 3E-88          | 1           |
| <i>tubulin beta-3, TUB3</i>                             | <i>G. hirsutum</i>        | 54036491         | 3E-67          | 1           |
| <i>tubulin beta-5, TUB5</i>                             | <i>T. aestivum</i>        | 8928427          | 7E-63          | 2           |
| <i>tubulin beta-8, TUB8</i>                             | <i>A. thaliana</i>        | 2773526          | 2E-132         | 1           |
| <i>cell division protease ftsH homolog 10, AtftsH10</i> | <i>A. thaliana</i>        | 75331189         | 9E-49          | 2           |
| cell division control protein 48 homolog A, AtCDC48a    | <i>A. thaliana</i>        | 1705677          | 2E-157         | 1           |
| WUS-interacting protein 2                               | <i>A. thaliana</i>        | 298352695        | 3E-75          | 1           |

## Supplemental Table S10: List of Primers

|                                              | <b>forward sequence 5'-3'</b> | <b>Reverse sequence 3'-5'</b> |
|----------------------------------------------|-------------------------------|-------------------------------|
| > <i>Phytochrome associated protein 1</i>    | GACCTCTGAAGAGTTGGTCTACGGCA    | TGGCCTCCGGTTCGTTTCGTTTC       |
| > <i>polygalacturonase inhibitor</i>         | TAACCACCGCGTCACCGCCCTA        | CCGGTCAGATTCGTCCAGCTG         |
| > <i>Rab family Gtpase</i>                   | CATTGCCCTCGGTAATAAGCAGTG      | CCTTATCGGTGACAGCGGTGTTGG      |
| > <i>V-typeATPase</i>                        | GCACCCCAGGCTTTACACTTT         | GCGTTGGATGCATAGCTTGA          |
| > <i>Aquaporin</i>                           | CTCCCACGAACGGTCCAACCC         | TTACAGCACCGGGACTGCTCTTGG      |
| > <i>ARF1-binding protein</i>                | CCGAGGTCAACCACGAAGGCAT        | GTTCCAGTTGAAATAGCGTGCCAGG     |
| > <i>Expansin</i>                            | CCGGGTTAATGGTTTTTTTTTCC       | CTGCTTGAGTCTTCCCCAGATT        |
| > <i>tryptophan n-hydroxylase 1</i>          | GTTAAAGGCGGCGACAGGATGGA       | GGCAACCCATTGCTTACCGCTG        |
| > <i>ATCNGC9</i>                             | CATCAAACGCCATCTCTGTCTGGC      | CCACTTCTCCCACCGTCTGTTCGT      |
| > <i>inorganic phosphate transporter 1-4</i> | CTTCACCGACGCTTACGATCTCTTCT    | CGACAGAGCAAAGGACCATGACCA      |
| > <i>tubulin beta-5</i>                      | GTGGACGAACAGATGATAAACGTGCAG   | TCCTGAACATGGCTGTGAACTGCTC     |
| > <i>topless-related protein 4-like</i>      | TCATCAGAACAGGGTAACAGGTCTTGCT  | CGAACCCACTGCATCCACCAATC       |
| > <i>Secologanin synthase</i>                | AGGATAAGATGAGCACCAAAGTGTGGG   | AACGATGCAGGGGAGTTCAAGCC       |
| > <i>epidermis glycoprotein</i>              | AGCCGTGGAAGATTCCGACACC        | ATTCTACACTCGTCGTTACCGTCGGTAT  |
| > <i>Arginine decarboxylase</i>              | AAGCTGAAGCAGAGATGTGTTGAAGGTT  | CTTCCCCTCACTATCACACGTCAAATCC  |
| > <i>Cell division protease ftsh</i>         | GGTCACGCGGTTGCTGGTTGGT        | CAATACCTGTTCCGGCTGCACGG       |
| > <i>Aux1</i>                                | GCTGCGCACGCTCCGGTCTCC-3       | TGAGAGCTTAACACGCATTCAAAGGGGAT |
| > <i>efflux carrier pin 3</i>                | TCTGATGCTGTTGATGGCTATGT       | CTGAGCCAGGGAGCTGACA           |
| > <i>RHD4</i>                                | AACGCGTTGGATGCATAGC           | CCCCAGGCTTTACACTTTATGCT       |
| > <i>Glutathione s-transferase ParC</i>      | CGCTGCCCTATAGTGAGTCGTA        | TGAGCGGATAACAATTTACACA        |
| <b>Internal control</b>                      |                               |                               |
| <i>BnActin</i>                               | GTGACAATGGAAGTGGAAATGG        | ACGGAGGATAGCGTGAGGAA          |
